# Supplementary material for: Evaluation of the effect of antibiotics on gut microbiota in early life based on culturomics, SMRT sequencing and metagenomics sequencing methods
Source: Royal Society of Chemistry journal article supplement (doi:10.1039/d1ay01106e), 2021-01-01
Supplement: d1ay01106e1.pdf [file d1ay01106e1.pdf]

## Supplementary Material

**Table S1.** Main characteristics of six infants

| Sample | Sexuality | Age(d) | Birth weight(g) | Delivery mode     | Full-term delivery | Feeding mode | Probiotic | Antibiotic              |
|--------|-----------|--------|-----------------|-------------------|--------------------|--------------|-----------|-------------------------|
| A1     | Girl      | 120    | 2800            | Vaginal delivered | Yes                | Breast milk  | No        | No                      |
| A2     | Girl      | 127    | 3320            | Vaginal delivered | Yes                | Breast milk  | No        | No                      |
| A3     | Girl      | 118    | 3570            | Vaginal delivered | Yes                | Breast milk  | No        | No                      |
| B1     | Girl      | 125    | 3740            | Vaginal delivered | Yes                | Breast milk  | No        | Amoxicillin (560mg, 3d) |
| B2     | Girl      | 110    | 3690            | Vaginal delivered | Yes                | Breast milk  | No        | Amoxicillin (625mg, 3d) |
| B3     | Girl      | 121    | 3150            | Vaginal delivered | Yes                | Breast milk  | No        | Amoxicillin (680mg, 4d) |

**Table S2.** 18 classical culture conditions of culturomics

| <b>Number</b> | <b>Fluid medium</b>                                                                         | <b>Plate cultivation</b> | <b>Culture environment</b>   |
|---------------|---------------------------------------------------------------------------------------------|--------------------------|------------------------------|
| 1             | Preincubation in aerobic blood culture bottle with stool filtered at 5 µm                   |                          | Aerobic conditions at 37°C   |
| 2             | Preincubation in aerobic blood culture bottle with 5 ml sheep blood                         |                          | Aerobic conditions at 37°C   |
| 3             | Preincubation in aerobic blood culture bottle with 5 ml rumen fluid and sheep blood         |                          | Aerobic conditions at 37°C   |
| 4             | Preincubation in aerobic blood culture bottle with 5 ml rumen fluid                         |                          | Aerobic conditions at 37°C   |
| 5             | Preincubation in anaerobic blood culture bottle after thermic shock at 80°C maintain 20 min |                          | Anaerobic conditions at 37°C |
| 6             | Preincubation in anaerobic blood culture bottle with stool filtered at 5 µm                 |                          | Anaerobic conditions at 37°C |
| 7             | Preincubation in anaerobic blood culture bottle with 5 ml sheep blood                       |                          | Anaerobic conditions at 37°C |
| 8             | Preincubation in anaerobic blood culture bottle                                             |                          | Anaerobic conditions at 37°C |
| 9             | Preincubation in anaerobic blood culture bottle with 5 ml rumen fluid and sheep blood       | 5% sheep blood agar      | Anaerobic conditions at 37°C |
| 10            | Preincubation in anaerobic blood culture bottle with 5 ml rumen fluid                       |                          | Anaerobic conditions at 37°C |
| 11            | Preincubation under anaerobic conditions in marine broth                                    |                          | Anaerobic conditions at 37°C |
| 12            | Preincubation in aerobic marine broth                                                       |                          | Aerobic conditions at 37°C   |
| 13            | Preincubation under aerobic conditions in 5% sheep blood broth                              |                          | Aerobic conditions at 37°C   |
| 14            | Preincubation under anaerobic conditions in 5% sheep blood broth                            |                          | Anaerobic conditions at 28°C |
| 15            | Preincubation under aerobic conditions in 5% sheep blood broth                              |                          | Aerobic conditions at 28°C   |
| 16            | Preincubation under anaerobic conditions in 5% sheep blood broth                            |                          | Anaerobic conditions at 37°C |
| 17            | Preincubation under aerobic conditions in Trypticase soy broth                              |                          | Aerobic conditions at 37°C   |
| 18            | Preincubation under aerobic conditions in brain heart infusion broth with 5% sheep blood    |                          | Aerobic conditions at 37°C   |
